# Supplementary material for: Beyond conventional nonlinear fracture mechanics in graphene nanoribbons
Source: Royal Society of Chemistry journal article supplement (doi:10.1039/d0nr03836a), 2020-01-01
Supplement: d0nr03836a1.pdf [file d0nr03836a1.pdf]

**Electronic Supplementary Information** for

**Beyond conventional nonlinear fracture mechanics in graphene nanoribbons**

Takahiro Shimada <sup>1\*</sup>, Kai Huang <sup>1,2\*</sup>, Le Van Lich <sup>1,3</sup>, Naoki Ozaki <sup>1</sup>, Bongkyun Jang <sup>1,4</sup>, and Takayuki Kitamura <sup>1</sup>

<sup>1</sup> *Department of Mechanical Engineering and Science, Kyoto University, Kyoto 615-8540, Japan*

<sup>2</sup> *Department of Astronautic Science and Mechanics, Harbin Institute of Technology, Harbin 150001, China*

<sup>3</sup> *School of Materials Science and Engineering, Hanoi University of Science and Technology, Hanoi, Viet Nam*

<sup>4</sup> *Department of Applied Nano-mechanics, Korea Institute of Machinery & Materials, Daejeon 34103, Korea*

\* Corresponding authors: [shimada@me.kyoto-u.ac.jp](mailto:shimada@me.kyoto-u.ac.jp) (T. Shimada), [huangkai@hit.edu.cn](mailto:huangkai@hit.edu.cn) (K. Huang).

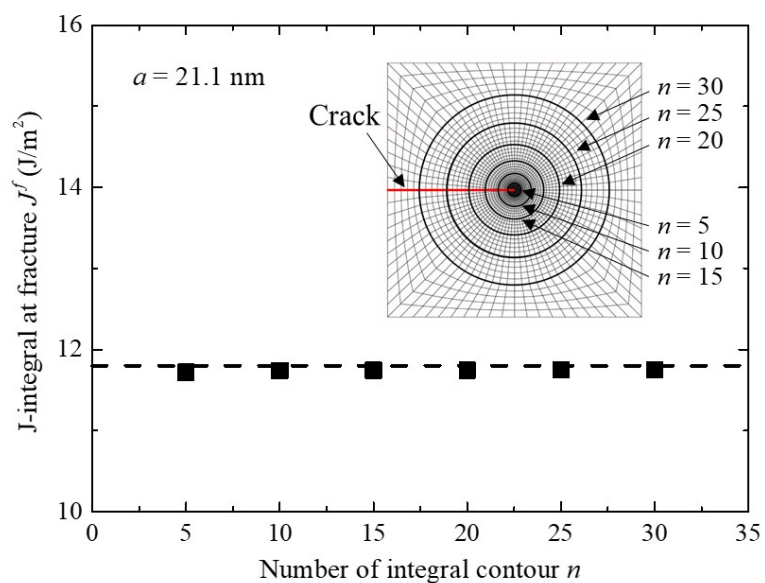

**Figure S1.** J-integral at fracture  $J^f$  as a function of number of integral contour  $n$  around the crack tip for the specimen of  $a = 21.1 \text{ nm}$ .

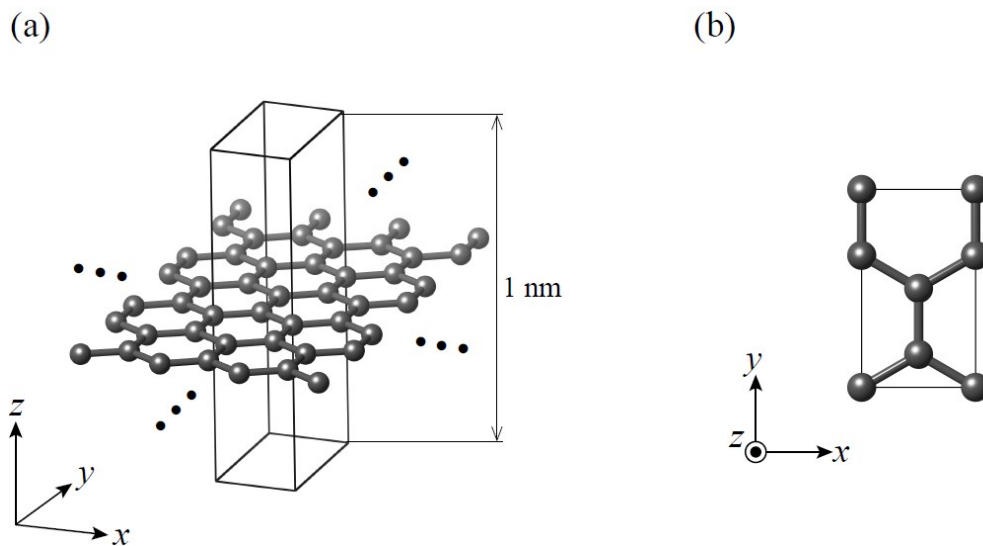

**Figure S2.** Simulation model of single-layer pristine graphene. (a) 3-dimensional view of the model. (b) Unit cell of the model with a view from  $z$  axis direction.

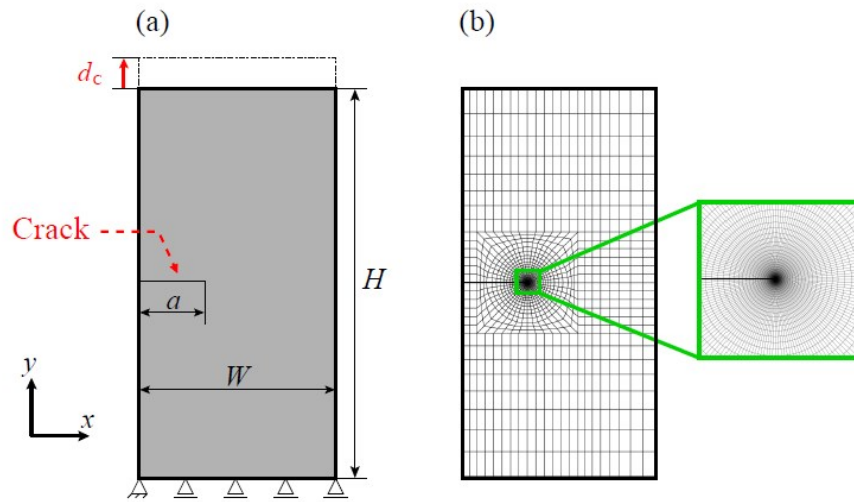

**Figure S3.** Finite element models of pre-cracked graphene nanoribbon specimens for stress analysis.
